# Supplementary material for: Identification of QTL for UV-Protective Eye Area Pigmentation in Cattle by Progeny Phenotyping and Genome-Wide Association Analysis
Source: PubMed Central journal article supplement (PMC3342244; doi:10.1371/journal.pone.0036346), 2012-05-02

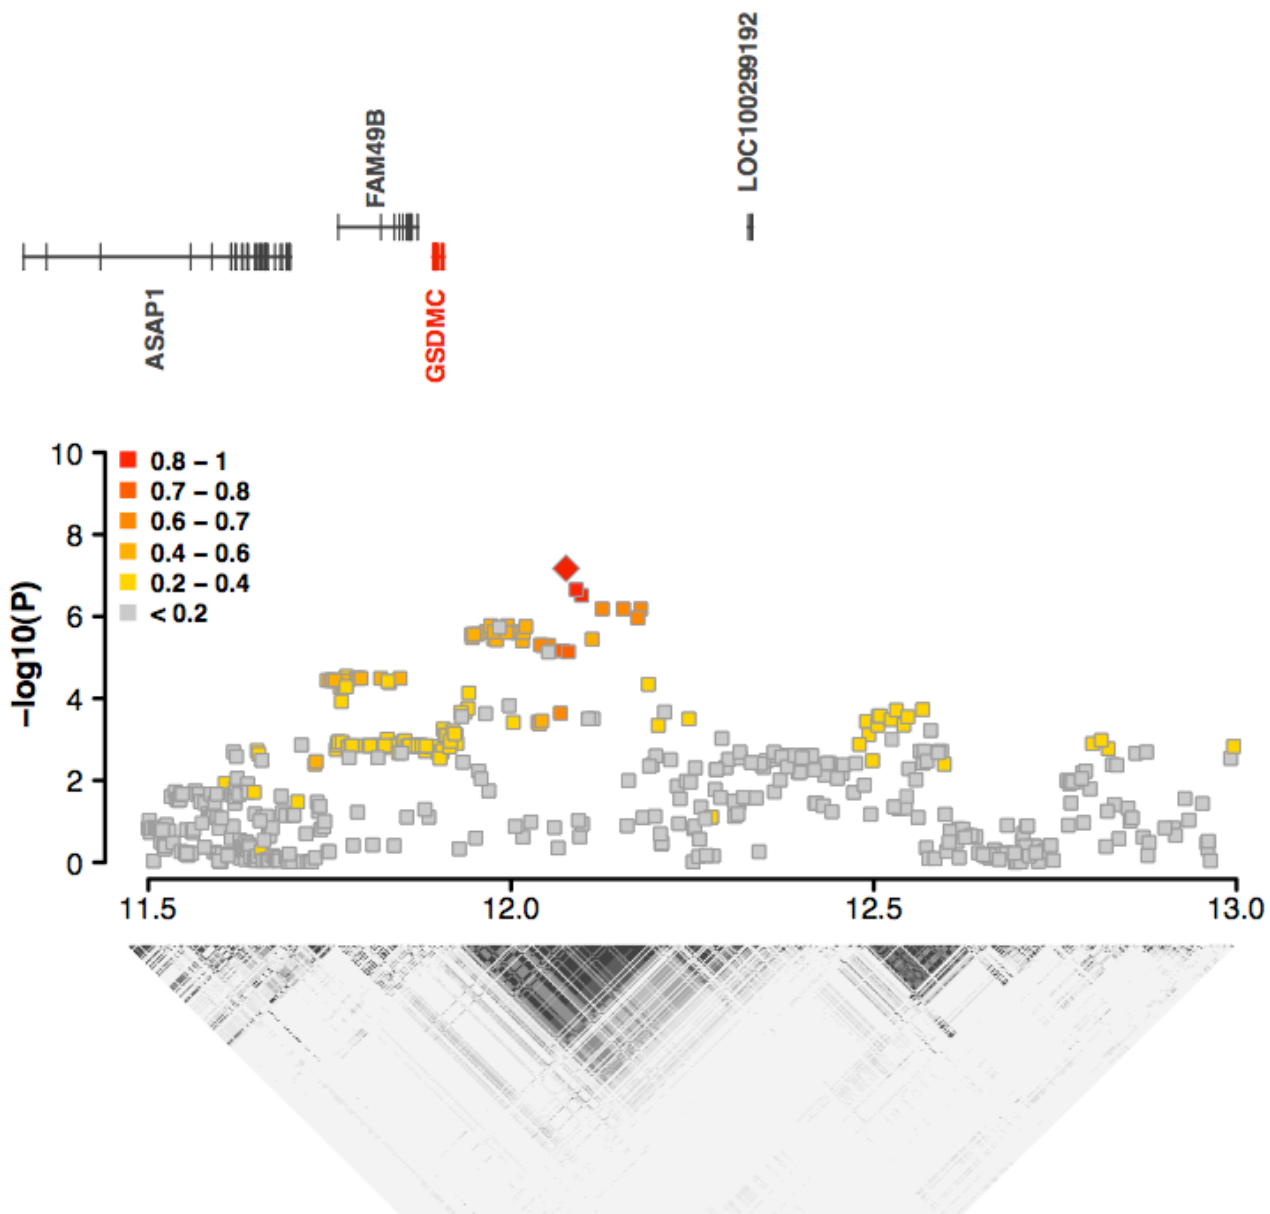

Supplement: pone.0036346.s010.pdf [file pone.0036346.s010.pdf]
