# Supplementary material for: Identification of QTL for UV-Protective Eye Area Pigmentation in Cattle by Progeny Phenotyping and Genome-Wide Association Analysis
Source: PubMed Central journal article supplement (PMC3342244; doi:10.1371/journal.pone.0036346), 2012-05-02
Supplement: pone.0036346.s019.pdf [file pone.0036346.s019.pdf]

| Quality parameter                                                        | 54Kv1  | 54Kv2  | 777K    |
|--------------------------------------------------------------------------|--------|--------|---------|
| SNPs                                                                     | 54,001 | 54,609 | 777,962 |
| Individuals                                                              | 2,545  | 842    | 810     |
| SNPs with unknown, Y-chromosomal or Mt-chromosomal position              | 549    | 1,075  | 3,302   |
| SNPs with genotyping rate < 90%                                          | 761    | 256    | 7,854   |
| SNPs with minor allele frequency < 0.5%                                  | 7,579  | 8,119  | 112,375 |
| SNPs showing deviation from the Hardy-Weinberg Equilibrium (P<0.001)     | 704    | 401    | 4,578   |
| Individuals with genotyping rate < 90%                                   | 6      | 11     | 1       |
| Individuals with discrepancies between pedigree and genomic relationship | 7      | 1      | 7       |
| Duplicate SNPs (identical physical position, distinct SNP-id)            | 29     | 30     | 54      |
| Remaining animals                                                        | 2,532  | 830    | 802     |
| Remaining SNPs                                                           | 44,759 | 44,953 | 653,294 |
