# Supplementary material for: Identification of QTL for UV-Protective Eye Area Pigmentation in Cattle by Progeny Phenotyping and Genome-Wide Association Analysis
Source: PubMed Central journal article supplement (PMC3342244; doi:10.1371/journal.pone.0036346), 2012-05-02
Supplement: pone.0036346.s020.pdf [file pone.0036346.s020.pdf]

---

| Dataset | 54Kv1  | 54Kv2  | 777K    |
|---------|--------|--------|---------|
| 54Kv1   | 44,759 | 43,029 | 40,062  |
| 54Kv2   |        | 44,953 | 40,350  |
| 777K    |        |        | 653,294 |

---
