# Supplementary material for: Identification of QTL for UV-Protective Eye Area Pigmentation in Cattle by Progeny Phenotyping and Genome-Wide Association Analysis
Source: PubMed Central journal article supplement (PMC3342244; doi:10.1371/journal.pone.0036346), 2012-05-02
Supplement: pone.0036346.s021.pdf [file pone.0036346.s021.pdf]

---

| Dataset | 54Kv1 | 54Kv2 | 777K |
|---------|-------|-------|------|
| 54Kv1   | 2,532 | -     | 521  |
| 54Kv2   |       | 830   | -    |
| 777K    |       |       | 802  |

---
