# Supplementary material for: Identification of QTL for UV-Protective Eye Area Pigmentation in Cattle by Progeny Phenotyping and Genome-Wide Association Analysis
Source: PubMed Central journal article supplement (PMC3342244; doi:10.1371/journal.pone.0036346), 2012-05-02
Supplement: pone.0036346.s022.pdf [file pone.0036346.s022.pdf]

| Chromosome | Chromosome length [Mb] | Number of high-density SNPs | Average distance between two high-density SNPs [bp] | Number of medium-density SNPs | Average distance between two medium-density SNPs [bp] |
|------------|------------------------|-----------------------------|-----------------------------------------------------|-------------------------------|-------------------------------------------------------|
| 1          | 158.34                 | 40,100                      | 3948                                                | 2607                          | 60,665                                                |
| 2          | 137.06                 | 33,962                      | 4024                                                | 2070                          | 65,977                                                |
| 3          | 121.43                 | 30,848                      | 3935                                                | 1907                          | 63,520                                                |
| 4          | 120.83                 | 30,482                      | 3957                                                | 1936                          | 62,235                                                |
| 5          | 121.19                 | 29,777                      | 4069                                                | 1648                          | 73,515                                                |
| 6          | 119.46                 | 30,781                      | 3880                                                | 1969                          | 60,474                                                |
| 7          | 112.64                 | 28,290                      | 3981                                                | 1751                          | 64,219                                                |
| 8          | 113.38                 | 24,935                      | 4546                                                | 1812                          | 62,346                                                |
| 9          | 105.71                 | 26,663                      | 3964                                                | 1578                          | 66,877                                                |
| 10         | 104.3                  | 27,127                      | 3844                                                | 1652                          | 62,440                                                |
| 11         | 107.31                 | 28,544                      | 3758                                                | 1691                          | 63,419                                                |
| 12         | 91.16                  | 22,267                      | 4091                                                | 1280                          | 71,106                                                |
| 13         | 84.24                  | 18,409                      | 4569                                                | 1372                          | 61,149                                                |
| 14         | 84.65                  | 19,369                      | 4339                                                | 1418                          | 58,682                                                |
| 15         | 85.3                   | 21,860                      | 3899                                                | 1267                          | 66,809                                                |
| 16         | 81.72                  | 21,055                      | 3878                                                | 1249                          | 65,104                                                |
| 17         | 75.15                  | 19,808                      | 3793                                                | 1223                          | 61,280                                                |
| 18         | 66                     | 17,556                      | 3751                                                | 1008                          | 64,947                                                |
| 19         | 64.06                  | 17,289                      | 3699                                                | 1058                          | 60,115                                                |
| 20         | 72.04                  | 19,426                      | 3703                                                | 1193                          | 60,022                                                |
| 21         | 71.6                   | 18,336                      | 3903                                                | 1056                          | 67,461                                                |
| 22         | 61.44                  | 16,605                      | 3691                                                | 995                           | 61,529                                                |
| 23         | 52.53                  | 13,751                      | 3815                                                | 811                           | 64,475                                                |
| 24         | 62.71                  | 15,987                      | 3918                                                | 973                           | 63,891                                                |
| 25         | 42.9                   | 11,947                      | 3581                                                | 743                           | 57,610                                                |
| 26         | 51.68                  | 13,932                      | 3707                                                | 834                           | 61,168                                                |
| 27         | 45.41                  | 11,948                      | 3800                                                | 735                           | 61,761                                                |
| 28         | 46.31                  | 11,832                      | 3909                                                | 736                           | 62,794                                                |
| 29         | 51.51                  | 13,302                      | 3864                                                | 800                           | 63,958                                                |
| 30         | 148.82                 | 17,106                      | 8699                                                | 690                           | 215,681                                               |
